# Supplementary material for: Decoding reactive structures in dilute alloy catalysts
Source: PubMed Central journal article supplement (PMC8837610; doi:10.1038/s41467-022-28366-w), 2022-02-11
Supplement: 41467_2022_28366_MOESM1_ESM.pdf [file 41467_2022_28366_MOESM1_ESM.pdf]

# Supplementary Information for

## Decoding Reactive Structures in Dilute Alloy Catalysts

5 Nicholas Marcella<sup>1\*</sup>, Jin Soo Lim<sup>2\*</sup>, Anna M. Płonka<sup>1\*</sup>, George Yan<sup>3\*</sup>, Cameron J. Owen<sup>2</sup>, Jessi  
E. S. van der Hoeven<sup>2,4</sup>, Alexandre C. Foucher<sup>5</sup>, Hio Tong Ngan<sup>3</sup>, Steven B. Torrisi<sup>6</sup>, Nebojsa S.  
Marinkovic<sup>7</sup>, Eric A. Stach<sup>5</sup>, Jason F. Weaver<sup>8</sup>, Joanna Aizenberg<sup>2,4</sup>, Philippe Sautet<sup>3,9</sup>, Boris  
Kozinsky<sup>4,10</sup>✉, and Anatoly I. Frenkel<sup>1,11</sup>✉

Correspondence to: [bkoz@seas.harvard.edu](mailto:bkoz@seas.harvard.edu); [anatoly.frenkel@stonybrook.edu](mailto:anatoly.frenkel@stonybrook.edu)

10

**This PDF file includes:**

Supplementary Methods

15 Supplementary Tables

Supplementary Figures

Supplementary References

## Supplementary Methods

### 1. DFT calculation: Surface segregation of Pd/Au(111) with O<sub>2</sub> and H<sub>2</sub> chemisorption

We investigate the relative stability of surface Pd ensembles with and without chemisorbed oxygen and hydrogen. We first examine the dissociative adsorption energy of O<sub>2</sub> on Pd(111), defined as:

$$E_{\text{ads}} = E[\text{O}_{(\text{ads})}/\text{Pd}(111)] - E[\text{Pd}(111)] - \frac{1}{2}E[\text{O}_{2(\text{g})}] \quad (1)$$

PBE provides O adsorption energy of  $-1.41$  eV at the low-coverage limit, overbound by  $\sim 0.3$  eV from the experimental benchmark of  $-1.15$  eV<sup>1</sup>. Furthermore, GGA is well-known to overestimate the molecular O<sub>2</sub> bond energy<sup>2</sup>: we obtain  $5.65$  eV with PBE, overestimated by  $0.53$  eV from the experimental value of  $5.12$  eV<sup>3</sup>. To obtain a more realistic gas-phase O<sub>2</sub> reference, we apply an energy correction of  $\delta_{\text{O}_2} = +0.53$  eV per O<sub>2</sub> molecule in our thermodynamic analysis. We do not apply the commonly employed correction of  $1.36$  eV per O<sub>2</sub> molecule proposed by Wang *et al.*<sup>4</sup> for two main reasons. First, the value was extracted from formation enthalpies of nontransition metal oxides, which are chemically different from our metallic ensembles with chemisorbed O. More importantly, because  $1.36$  eV is much larger than our PBE bond energy error, the correction would over-destabilize O<sub>2</sub> and consequently further overestimate the adsorption energy.

The relative energies are evaluated in terms of the Gibbs free energy of surface segregation, normalized by the number of Pd atoms, with and without adsorbate  $X = \text{O}, \text{H}$  (Supplementary Fig.

5):

$$G_{\text{seg}} = \frac{E[x\text{X}_{(\text{ads})}/\text{Pd}_n^{\text{surf}}\text{Au}(111)] + (n-1)E[\text{Au}(111)] - nE[\text{Pd}_1^{\text{sub}}\text{Au}(111)] - \frac{x}{2}G[\text{X}_{2(\text{g})}]}{n} \quad (2)$$

Here,  $(n, x)$  are the number of (Pd, X) atoms in the unit cell. We primarily consider  $n = 1-3$  (up to Pd trimer) and  $x = 0, 2$  (without and with chemisorbed  $O_2$ , respectively). The energy is referenced to gas-phase  $X_2$  and isolated Pd monomers in the subsurface layer of Au(111), labeled  $Pd_1^{sub}Au(111)$ , which is the thermodynamically favored configuration in vacuum. As a first  
 5 approximation, we only consider the translational and rotational entropies of the gas-phase molecule at the experimental pretreatment conditions of  $O_2$  at 0.20 atm and 500 °C; and  $H_2$  at 0.25 atm and 150 °C. The vibrational contributions are typically small for slab systems<sup>5</sup> and hence not considered in this analysis.

Extended surface Pd is also considered as the limiting case of larger ensembles: Pd  
 10 monolayer with a full coverage of H; and a surface Pd oxide model with stoichiometry  $Pd_5O_4$  from a previous study of Pd/Ag(111)<sup>6</sup>. The oxide unit cell consists of 35 Pd atoms and 28 O atoms (labeled  $Pd_{35}O_{28}$ ) on top of three layers of 48 Au atoms (labeled  $Au_{3 \times 48}$ ). The Brillouin zone is sampled using a Monkhorst-Pack  $3 \times 1 \times 1$   $k$ -point grid<sup>7</sup>. The segregation free energy is defined as:

$$G_{seg}[Pd_5O_4/Au(111)] = \frac{E[Pd_{35}O_{28}/Au_{3 \times 48}] + \left(34 + \frac{13}{4 \times 48}\right)E[Au_{4 \times 48}] - 35E[Pd_1^{sub}Au_{(4 \times 48)-1}] - 14G[O_{2(g)}}{35} \quad (3)$$

15 Here, the energy is referenced to gas-phase  $O_2$  and four layers of 48 Au atoms with an isolated Pd monomer in the subsurface layer (labeled  $Pd_1^{sub}Au_{(4 \times 48)-1}$ ). The energy of  $Au_{4 \times 48}$  per atom is used to balance the difference of 13 Au atoms upon formation of the oxide layer with 35 Pd atoms.

## 2. DFT calculation: H spillover on Pd/Au(111)

20 HD exchange involves three classes of elementary steps (Supplementary Tables 4-6): (i) dissociative adsorption of  $H_2$  and  $D_2$ ; (ii) spillover and migration of atomic H or D across different active sites (so-called "scrambling"); and (iii) recombinative desorption of HD. On dilute Pd ensembles, it is energetically favorable for chemisorption of  $H_2$  and  $D_2$  to occur on separate

ensembles to minimize lateral repulsion. Consequently, the resulting H/D atoms must undergo spillover from Pd to the Au surface and migrate to a different ensemble for HD formation to occur. In most cases, atomic H/D chemisorption on Pd<sub>n</sub> site ( $n = 1-3$ ) results in two types of species: one coordinated to  $n$  Pd atoms (denoted H<sub>1</sub><sup>( $n$ )</sup> and D<sub>1</sub><sup>( $n$ )</sup>); and the other coordinated to only 1 Pd atom at the ensemble boundary (denoted H<sub>1</sub><sup>(1)</sup> and D<sub>1</sub><sup>(1)</sup>). Across all of our models, spillover exhibits a rather consistent energy barrier of 0.2-0.3 eV per Pd-H/D bond broken. As such, it is H<sub>1</sub><sup>(1)</sup>/D<sub>1</sub><sup>(1)</sup>, rather than H<sub>1</sub><sup>( $n$ )</sup>/D<sub>1</sub><sup>( $n$ )</sup>, that preferentially undergoes spillover. The subsequent migration on Au is facile, with barriers of only 0.05 and 0.19 eV on terrace and step edges, respectively (Supplementary Fig. 6a). We note that the tunneling effect, which would require a full quantum mechanical treatment of the H/D nuclei, remains negligible at reaction temperatures of interest (323 K and above)<sup>8</sup>. Taken together, spillover and migration remain of secondary importance compared to chemisorption/desorption in terms of the overall reaction kinetics.

### 3. Microkinetic modeling: Reaction mechanisms and energetics

Temperature programmed desorption experiments have established that H and D atoms do not adsorb as strongly on dilute Pd/Au(111) as on pure Pd(111)<sup>9,10</sup>. Previous DFT calculations (using the PBE functional with dDsC dispersion corrections) have found H<sub>2</sub> chemisorption on Pd monomers to be endergonic at 90 °C under 0.2 bar of H<sub>2</sub><sup>11</sup>. We model H/D exchange over Pd<sub>n</sub>/Au(111) ( $n = 1, 2, 3$ ) as a three-fold process. (i) A H<sub>2</sub> molecule adsorbs on the Pd ensemble and dissociates to generate two H ligands. The H atoms can then spill over and exchange across the Au substrate. (ii) A D<sub>2</sub> molecule undergoes the same process. (iii) The resulting H and D atoms combine on one of the Pd ensembles to form and desorb as a HD molecule.

On Pd<sub>1</sub>, H<sub>2</sub> first undergoes a molecular adsorption which is endergonic by +0.23 eV (Supplementary Table 4, reaction 1). By crossing a barrier of 0.37 eV, the H<sub>2</sub> molecule dissociates to generate two H atoms bound to Pd<sub>1</sub> (labeled Pd<sub>1</sub>H<sub>1</sub><sup>(1)</sup>; superscript on H indicates H-Pd coordination number), which is endergonic by +0.07 eV relative to the molecularly adsorbed state (Supplementary Table 4, reaction 2). The ensuing spillover from Pd<sub>1</sub> to Au is modeled sequentially. The first H atom must cross a barrier of 0.22 eV to diffuse onto Au, with a similar barrier of 0.23 eV for the second H atom (Supplementary Table 4, reactions 3-4). The same four reactions apply to D<sub>2</sub> as well, with less frequent collision and a more endergonic chemisorption than H<sub>2</sub> due to the larger mass and entropy (Supplementary Table 4, reactions 5-8). Finally, an HD molecule is formed and desorbed after exchanging either a D or H atom across the Au substrate to Pd<sub>1</sub>H<sub>1</sub><sup>(1)</sup> or Pd<sub>1</sub>D<sub>1</sub><sup>(1)</sup> (Supplementary Table 4, reactions 9-12).

The reaction pathways on Pd<sub>2</sub> follows the same three-fold process as on Pd<sub>1</sub>. The key difference is that H and D can bind to either one or two Pd atoms. First, H<sub>2</sub> undergoes molecular adsorption which is endergonic by +0.20 eV (Supplementary Table 5, reaction 1), followed by dissociation into two H atoms after crossing a barrier of 0.17 eV (Supplementary Table 5, reaction 2). One H atom binds to two Pd atoms (labeled H<sub>1</sub><sup>(2)</sup>), while the other one binds to only one Pd atom (labeled H<sub>1</sub><sup>(1)</sup>). In contrast to the Pd<sub>1</sub> site, the dissociation on Pd<sub>2</sub> is exergonic by -0.10 eV relative to the molecularly adsorbed state. The adsorption strength of H is proportional to its coordination to Pd, resulting in two different spillover barriers of 0.24 and 0.44 eV for H<sub>1</sub><sup>(1)</sup> and H<sub>1</sub><sup>(2)</sup>, respectively (Supplementary Table 5, reactions 3-4). Similar energetics are observed for D<sub>2</sub> dissociation (Supplementary Table 5, reactions 5-8). Finally, the HD product molecule is formed by reacting Pd<sub>2</sub>H<sub>1</sub><sup>(2)</sup> or Pd<sub>2</sub>D<sub>1</sub><sup>(2)</sup> with an exchanged H or D atom (Supplementary Table 5, reactions 9-12).

Similar reaction mechanisms are considered on Pd<sub>3</sub>. First, H<sub>2</sub> undergoes molecular adsorption which is endergonic by +0.14 eV (Supplementary Table 6, reaction 1), followed by dissociation into two H atoms after crossing a barrier of 0.03 eV (Supplementary Table 6, reaction 2). One H atom binds to three Pd atoms (labeled H<sub>1</sub><sup>(3)</sup>), while the other binds to only one Pd atom (labeled H<sub>1</sub><sup>(1)</sup>). The dissociation is exergonic by -0.36 eV relative to the molecularly adsorbed state. Similar to Pd<sub>2</sub>, the spillover barrier of atomic H is proportional to its coordination to Pd, with values of 0.31 and 0.74 eV for H<sub>1</sub><sup>(1)</sup> and H<sub>1</sub><sup>(3)</sup>, respectively (Supplementary Table 6, reactions 3-4).

#### 4. Microkinetic modeling: Catalytic activity and analysis

At 50 °C, the H/D exchange reaction proceeds slowly on the Pd<sub>1</sub> ensemble. The weak H<sub>2</sub> adsorption on Pd<sub>1</sub> results in a low apparent activation energy of 0.25 eV at 50 °C (Fig. 4a). H<sub>2</sub> chemisorption is also endergonic on Pd<sub>1</sub> by +0.31 eV, compared to being barrierless on Pd(111)<sup>12</sup>. As such, Pd<sub>1</sub> remains bare under reaction conditions of interest. Calculation of the degree of rate control shows that bare Pd<sub>1</sub> is the rate-controlling intermediate, and the main rate-controlling transition states correspond to D<sub>2</sub> dissociation and HD formation (Supplementary Fig. 9a-c). H<sub>2</sub> dissociation and the diffusion of atomic H and D have minor rate-controlling behavior. As such, the apparent activation energy (0.25 eV) is approximately the relative enthalpy of the dissociation transition states (0.22 eV).

Compared to the Pd<sub>1</sub> site, the reaction rate for H/D exchange is much higher on Pd<sub>2</sub> at 50 °C (Supplementary Fig. 4b). Although the apparent activation energy remains low at 0.22 eV, the rate-controlling states are very different (Supplementary Fig. 9d-f). At 50 °C, the Pd<sub>2</sub> sites are partially covered with H and D; as such, Pd<sub>2</sub>H<sub>1</sub><sup>(2)</sup> and Pd<sub>2</sub>D<sub>1</sub><sup>(2)</sup> are the main rate-controlling

intermediates.  $D_2$  dissociation and HD formation correspond to the main rate-controlling transition states. As temperature increases to 150 °C, surface H and D become scarce, and bare  $Pd_2$  becomes the rate-controlling intermediate, thereby decreasing the apparent activation energy (Fig. 4b). The first D diffusion from  $Pd_2D_1^{(2)}D_1^{(1)}$  also becomes moderately rate-limiting.

5

Compared to the  $Pd_1$  and  $Pd_2$  sites,  $H_2$  adsorption is the strongest on  $Pd_3$ , and the coverages of  $H_1^{(3)}$  and  $D_1^{(3)}$  do not falter in the temperature range of 50-150 °C. As such, the main rate-controlling intermediates are  $Pd_3H_1^{(3)}$  and  $Pd_3D_1^{(3)}$ . On the other hand,  $D_2$  adsorption and HD desorption correspond to the main rate-controlling transition states (Supplementary Fig. 9g-i).  $D_2$  dissociation and HD formation do not exhibit rate-controlling behavior until above 100 °C. As a result, the apparent activation energy (0.52 eV) (Fig. 4c) is approximately the negative of the adsorption energy of a single H at the 3-fold Pd hollow site in  $Pd_3$  (0.59 eV).

10

## Supplementary Tables

### Supplementary Table 1

The best fit coordination numbers ( $C$ ), bond distances ( $R$ ), disorder factor ( $\sigma^2$ ), energy shifts ( $\Delta E_0$ ), and the NN-XANES derived coordination numbers ( $C^x$ ).

5

| State | Bond  | $C$            | $C^x$            | $R$ (Å)         | $\sigma^2$ (Å <sup>2</sup> ) | $\Delta E_0$ (eV) |
|-------|-------|----------------|------------------|-----------------|------------------------------|-------------------|
| S0    | Pd-Au | $11.1 \pm 1.7$ | $10.80 \pm 0.02$ | $2.81 \pm 0.01$ | $0.007 \pm 0.001$            | $-4.6 \pm 0.9$    |
|       | Pd-Pd | $0.3 \pm 0.6$  | $0.67 \pm 0.03$  | $2.77 \pm 0.05$ | $0 \pm 0.008$                |                   |
| S1    | Pd-Au | $9.7 \pm 1.5$  | $10.56 \pm 0.02$ | $2.87 \pm 0.01$ | $0.005 \pm 0.001$            | $-4.0 \pm 0.9$    |
|       | Pd-Pd | $0.8 \pm 0.6$  | $0.73 \pm 0.01$  | $2.79 \pm 0.04$ | $0 \pm 0.004$                |                   |
| S2    | Pd-Au | $12.5 \pm 0.5$ | $11.40 \pm 0.03$ | $2.80 \pm 0.02$ | $0.007 \pm 0.004$            | $-4.6 \pm 0.2$    |
|       | Pd-Pd | N/A            | $0.24 \pm 0.05$  | N/A             | N/A                          |                   |
| S3    | Pd-Au | $12.6 \pm 0.7$ | $11.64 \pm 0.05$ | $2.80 \pm 0.02$ | $0.007 \pm 0.004$            | $-4.7 \pm 0.4$    |
|       | Pd-Pd | N/A            | $0.05 \pm 0.05$  | N/A             | N/A                          |                   |



## Supplementary Table 2

Computational set-up of close-packed slab models considered for DFT modeling.

| Facet | Features             | Unit cell    | Number of layers   | <i>k</i> -point grid  |
|-------|----------------------|--------------|--------------------|-----------------------|
| (111) | Close-packed terrace | $3 \times 3$ | 6 (bottom 3 fixed) | $7 \times 7 \times 1$ |
| (211) | A-step edge          | $3 \times 4$ | 4 (bottom 1 fixed) | $8 \times 5 \times 1$ |
| (331) | B-step edge          | $6 \times 4$ | 4 (bottom 1 fixed) | $4 \times 5 \times 1$ |

### Supplementary Table 3

Statistical thermodynamics expressions of the translational, rotational, and vibrational components of the integrated constant-volume heat capacity ( $\int_0^T c_V dT$ ) and the entropy ( $S$ ) employed for free energy conversions<sup>13</sup>.  $m$  = molecular mass;  $I$  = principal moment of inertia;  $\sigma$  = symmetry number ( $\sigma = 1$  for HD;  $\sigma = 2$  for H<sub>2</sub> and D<sub>2</sub>).

5

| Component              | $\int_0^T c_V dT$                            | $S$                                                                                                                           |
|------------------------|----------------------------------------------|-------------------------------------------------------------------------------------------------------------------------------|
| Translational (3D)     | $\frac{3}{2}k_B T$                           | $k_B \left\{ \ln \left[ \left( \frac{2\pi m k_B T}{h^2} \right)^{\frac{3}{2}} \frac{k_B T}{P} \right] + \frac{5}{2} \right\}$ |
| Rotational (linear)    | $k_B T$                                      | $k_B \left\{ \ln \left[ \frac{8\pi^2 I k_B T}{\sigma h^2} \right] + \frac{3}{2} \right\}$                                     |
| Vibrational (harmonic) | $\sum_i \frac{h\nu_i}{e^{h\nu_i/k_B T} - 1}$ | $k_B \sum_i \left[ \frac{h\nu_i/k_B T}{e^{h\nu_i/k_B T} - 1} - \ln(1 - e^{-h\nu_i/k_B T}) \right]$                            |

### Supplementary Table 4

The elementary steps of HD exchange reaction on Pd<sub>1</sub>/Au(111). The Gibbs free energies at standard pressure and the rate constants are computed at 50 °C and 1 bar. Superscript on chemical species indicates its coordination number to Pd.

| #  | Elementary step                                                                                                                    | $\Delta G^\circ$<br>(eV) | $\Delta G_{\text{fwd}}^{\ddagger}$<br>(eV) | $k^{\text{fwd}}$<br>(s <sup>-1</sup> ) | $k^{\text{rev}}$<br>(s <sup>-1</sup> ) |
|----|------------------------------------------------------------------------------------------------------------------------------------|--------------------------|--------------------------------------------|----------------------------------------|----------------------------------------|
| 1  | $\text{Pd}_1 + \text{H}_{2(\text{g})} \rightleftharpoons \text{H}_2\text{Pd}_1$                                                    | 0.23                     | N/A                                        | $7.65 \times 10^8$                     | $3.26 \times 10^{12}$                  |
| 2  | $\text{H}_2\text{Pd}_1 \rightleftharpoons \text{Pd}_1\text{H}_2^{(1)}$                                                             | 0.07                     | 0.37                                       | $1.04 \times 10^7$                     | $1.48 \times 10^8$                     |
| 3  | $\text{Pd}_1\text{H}_2^{(1)} + \text{Au}_1 \rightleftharpoons \text{Pd}_1\text{H}_1^{(1)} + \text{Au}_1\text{H}_1$                 | 0.20                     | 0.22                                       | $2.27 \times 10^9$                     | $2.63 \times 10^{12}$                  |
| 4  | $\text{Pd}_1\text{H}_1^{(1)} + \text{Au}_1 \rightleftharpoons \text{Pd}_1 + \text{Au}_1\text{H}_1$                                 | 0.18                     | 0.23                                       | $1.87 \times 10^9$                     | $1.35 \times 10^{12}$                  |
| 5  | $\text{Pd}_1 + \text{D}_{2(\text{g})} \rightleftharpoons \text{D}_2\text{Pd}_1$                                                    | 0.24                     | N/A                                        | $5.41 \times 10^8$                     | $3.40 \times 10^{12}$                  |
| 6  | $\text{D}_2\text{Pd}_1 \rightleftharpoons \text{Pd}_1\text{D}_2^{(1)}$                                                             | 0.10                     | 0.39                                       | $4.71 \times 10^6$                     | $1.46 \times 10^8$                     |
| 7  | $\text{Pd}_1\text{D}_2^{(1)} + \text{Au}_1 \rightleftharpoons \text{Pd}_1\text{D}_1^{(1)} + \text{Au}_1\text{D}_1$                 | 0.20                     | 0.23                                       | $1.54 \times 10^9$                     | $2.08 \times 10^{12}$                  |
| 8  | $\text{Pd}_1\text{D}_1^{(1)} + \text{Au}_1 \rightleftharpoons \text{Pd}_1 + \text{Au}_1\text{D}_1$                                 | 0.19                     | 0.24                                       | $1.32 \times 10^9$                     | $1.07 \times 10^{12}$                  |
| 9  | $\text{Pd}_1 + \text{HD}_{(\text{g})} \rightleftharpoons \text{HDPd}_1$                                                            | 0.26                     | N/A                                        | $6.25 \times 10^8$                     | $6.49 \times 10^{12}$                  |
| 10 | $\text{HDPd}_1 \rightleftharpoons \text{Pd}_1\text{H}_1^{(1)}\text{D}_1^{(1)}$                                                     | 0.08                     | 0.38                                       | $8.56 \times 10^6$                     | $1.63 \times 10^8$                     |
| 11 | $\text{Pd}_1\text{H}_1^{(1)}\text{D}_1^{(1)} + \text{Au}_1 \rightleftharpoons \text{Pd}_1\text{H}_1^{(1)} + \text{Au}_1\text{D}_1$ | 0.20                     | 0.23                                       | $1.57 \times 10^9$                     | $2.08 \times 10^{12}$                  |
| 12 | $\text{Pd}_1\text{H}_1^{(1)}\text{D}_1^{(1)} + \text{Au}_1 \rightleftharpoons \text{Pd}_1\text{D}_1^{(1)} + \text{Au}_1\text{H}_1$ | 0.20                     | 0.22                                       | $2.22 \times 10^9$                     | $2.63 \times 10^{12}$                  |

### Supplementary Table 5

The elementary steps of HD exchange reaction on Pd<sub>2</sub>/Au(111). The Gibbs free energies at standard pressure and the rate constants are computed at 50 °C and 1 bar. Superscript on chemical species indicates its coordination number to Pd.

| #  | Elementary step                                                                                                                    | $\Delta G^\circ$<br>(eV) | $\Delta G_{\text{fwd}}^{o\ddagger}$<br>(eV) | $k^{\text{fwd}}$<br>(s <sup>-1</sup> ) | $k^{\text{rev}}$<br>(s <sup>-1</sup> ) |
|----|------------------------------------------------------------------------------------------------------------------------------------|--------------------------|---------------------------------------------|----------------------------------------|----------------------------------------|
| 1  | $\text{Pd}_2 + \text{H}_{2(\text{g})} \rightleftharpoons \text{H}_2\text{Pd}_2$                                                    | 0.20                     | N/A                                         | $1.53 \times 10^9$                     | $1.87 \times 10^{12}$                  |
| 2  | $\text{H}_2\text{Pd}_2 \rightleftharpoons \text{Pd}_2\text{H}_1^{(2)}\text{H}_1^{(1)}$                                             | -0.10                    | 0.17                                        | $1.26 \times 10^{10}$                  | $4.02 \times 10^8$                     |
| 3  | $\text{Pd}_2\text{H}_1^{(2)}\text{H}_1^{(1)} + \text{Au}_1 \rightleftharpoons \text{Pd}_2\text{H}_1^{(2)} + \text{Au}_1\text{H}_1$ | 0.17                     | 0.24                                        | $1.25 \times 10^9$                     | $5.51 \times 10^{11}$                  |
| 4  | $\text{Pd}_2\text{H}_1^{(2)} + \text{Au}_1 \rightleftharpoons \text{Pd}_2 + \text{Au}_1\text{H}_1$                                 | 0.40                     | 0.44                                        | $1.10 \times 10^6$                     | $1.88 \times 10^{12}$                  |
| 5  | $\text{Pd}_2 + \text{D}_{2(\text{g})} \rightleftharpoons \text{D}_2\text{Pd}_2$                                                    | 0.21                     | N/A                                         | $1.08 \times 10^9$                     | $1.96 \times 10^{12}$                  |
| 6  | $\text{D}_2\text{Pd}_2 \rightleftharpoons \text{Pd}_2\text{D}_1^{(2)}\text{D}_1^{(1)}$                                             | -0.08                    | 0.19                                        | $6.58 \times 10^9$                     | $4.21 \times 10^8$                     |
| 7  | $\text{Pd}_2\text{D}_1^{(2)}\text{D}_1^{(1)} + \text{Au}_1 \rightleftharpoons \text{Pd}_2\text{D}_1^{(2)} + \text{Au}_1\text{D}_1$ | 0.17                     | 0.25                                        | $8.77 \times 10^8$                     | $4.51 \times 10^{11}$                  |
| 8  | $\text{Pd}_2\text{D}_1^{(2)} + \text{Au}_1 \rightleftharpoons \text{Pd}_2 + \text{Au}_1\text{D}_1$                                 | 0.41                     | 0.45                                        | $7.46 \times 10^5$                     | $1.60 \times 10^{12}$                  |
| 9  | $\text{Pd}_2 + \text{HD}_{(\text{g})} \rightleftharpoons \text{HDPd}_2$                                                            | 0.22                     | N/A                                         | $1.25 \times 10^9$                     | $3.57 \times 10^{12}$                  |
| 10 | $\text{HDPd}_2 \rightleftharpoons \text{Pd}_2\text{H}_1^{(2)}\text{D}_1^{(1)}$                                                     | -0.09                    | 0.18                                        | $9.01 \times 10^9$                     | $4.07 \times 10^8$                     |
| 11 | $\text{Pd}_2\text{H}_1^{(2)}\text{D}_1^{(1)} + \text{Au}_1 \rightleftharpoons \text{Pd}_2\text{H}_1^{(2)} + \text{Au}_1\text{D}_1$ | 0.17                     | 0.25                                        | $8.90 \times 10^8$                     | $4.51 \times 10^{11}$                  |
| 12 | $\text{Pd}_2\text{H}_1^{(2)}\text{D}_1^{(1)} + \text{Au}_1 \rightleftharpoons \text{Pd}_2\text{D}_1^{(2)} + \text{Au}_1\text{H}_1$ | 0.17                     | 0.24                                        | $1.36 \times 10^9$                     | $5.51 \times 10^{11}$                  |

### Supplementary Table 6

The elementary steps of HD exchange reaction on Pd<sub>3</sub>/Au(111). The Gibbs free energies at standard pressure and the rate constants are computed at 50 °C and 1 bar. Superscript on chemical species indicates its coordination number to Pd.

| #  | Elementary step                                                                                                                    | $\Delta G^\circ$<br>(eV) | $\Delta G_{\text{fwd}}^{o\ddagger}$<br>(eV) | $k^{\text{fwd}}$<br>(s <sup>-1</sup> ) | $k^{\text{rev}}$<br>(s <sup>-1</sup> ) |
|----|------------------------------------------------------------------------------------------------------------------------------------|--------------------------|---------------------------------------------|----------------------------------------|----------------------------------------|
| 1  | $\text{Pd}_3 + \text{H}_{2(\text{g})} \rightleftharpoons \text{H}_2\text{Pd}_3$                                                    | 0.14                     | N/A                                         | $2.30 \times 10^9$                     | $3.22 \times 10^{11}$                  |
| 2  | $\text{H}_2\text{Pd}_3 \rightleftharpoons \text{Pd}_3\text{H}_1^{(3)}\text{H}_1^{(1)}$                                             | -0.36                    | 0.03                                        | $2.30 \times 10^{12}$                  | $4.72 \times 10^6$                     |
| 3  | $\text{Pd}_3\text{H}_1^{(3)}\text{H}_1^{(1)} + \text{Au}_1 \rightleftharpoons \text{Pd}_3\text{H}_1^{(3)} + \text{Au}_1\text{H}_1$ | 0.14                     | 0.31                                        | $1.08 \times 10^8$                     | $1.88 \times 10^{10}$                  |
| 4  | $\text{Pd}_3\text{H}_1^{(3)} + \text{Au}_1 \rightleftharpoons \text{Pd}_3 + \text{Au}_1\text{H}_1$                                 | 0.66                     | 0.74                                        | $2.05 \times 10^1$                     | $3.89 \times 10^{11}$                  |
| 5  | $\text{Pd}_3 + \text{D}_{2(\text{g})} \rightleftharpoons \text{D}_2\text{Pd}_3$                                                    | 0.15                     | N/A                                         | $1.62 \times 10^9$                     | $3.38 \times 10^{11}$                  |
| 6  | $\text{D}_2\text{Pd}_3 \rightleftharpoons \text{Pd}_3\text{D}_1^{(3)}\text{D}_1^{(1)}$                                             | -0.35                    | 0.05                                        | $9.68 \times 10^{11}$                  | $3.66 \times 10^6$                     |
| 7  | $\text{Pd}_3\text{D}_1^{(3)}\text{D}_1^{(1)} + \text{Au}_1 \rightleftharpoons \text{Pd}_3\text{D}_1^{(3)} + \text{Au}_1\text{D}_1$ | 0.15                     | 0.32                                        | $7.94 \times 10^7$                     | $1.54 \times 10^{10}$                  |
| 8  | $\text{Pd}_3\text{D}_1^{(3)} + \text{Au}_1 \rightleftharpoons \text{Pd}_3 + \text{Au}_1\text{D}_1$                                 | 0.67                     | 0.75                                        | $1.27 \times 10^1$                     | $3.18 \times 10^{11}$                  |
| 9  | $\text{Pd}_3 + \text{HD}_{(\text{g})} \rightleftharpoons \text{HDPd}_3$                                                            | 0.16                     | N/A                                         | $1.88 \times 10^9$                     | $6.17 \times 10^{11}$                  |
| 10 | $\text{HDPd}_3 \rightleftharpoons \text{Pd}_3\text{H}_1^{(3)}\text{D}_1^{(1)}$                                                     | -0.37                    | 0.04                                        | $1.57 \times 10^{12}$                  | $3.19 \times 10^6$                     |
| 11 | $\text{Pd}_3\text{H}_1^{(3)}\text{D}_1^{(1)} + \text{Au}_1 \rightleftharpoons \text{Pd}_3\text{H}_1^{(3)} + \text{Au}_1\text{D}_1$ | 0.16                     | 0.33                                        | $5.59 \times 10^7$                     | $1.54 \times 10^{10}$                  |
| 12 | $\text{Pd}_3\text{H}_1^{(3)}\text{D}_1^{(1)} + \text{Au}_1 \rightleftharpoons \text{Pd}_3\text{D}_1^{(3)} + \text{Au}_1\text{H}_1$ | 0.15                     | 0.31                                        | $9.06 \times 10^7$                     | $1.88 \times 10^{10}$                  |

## Supplementary Figures

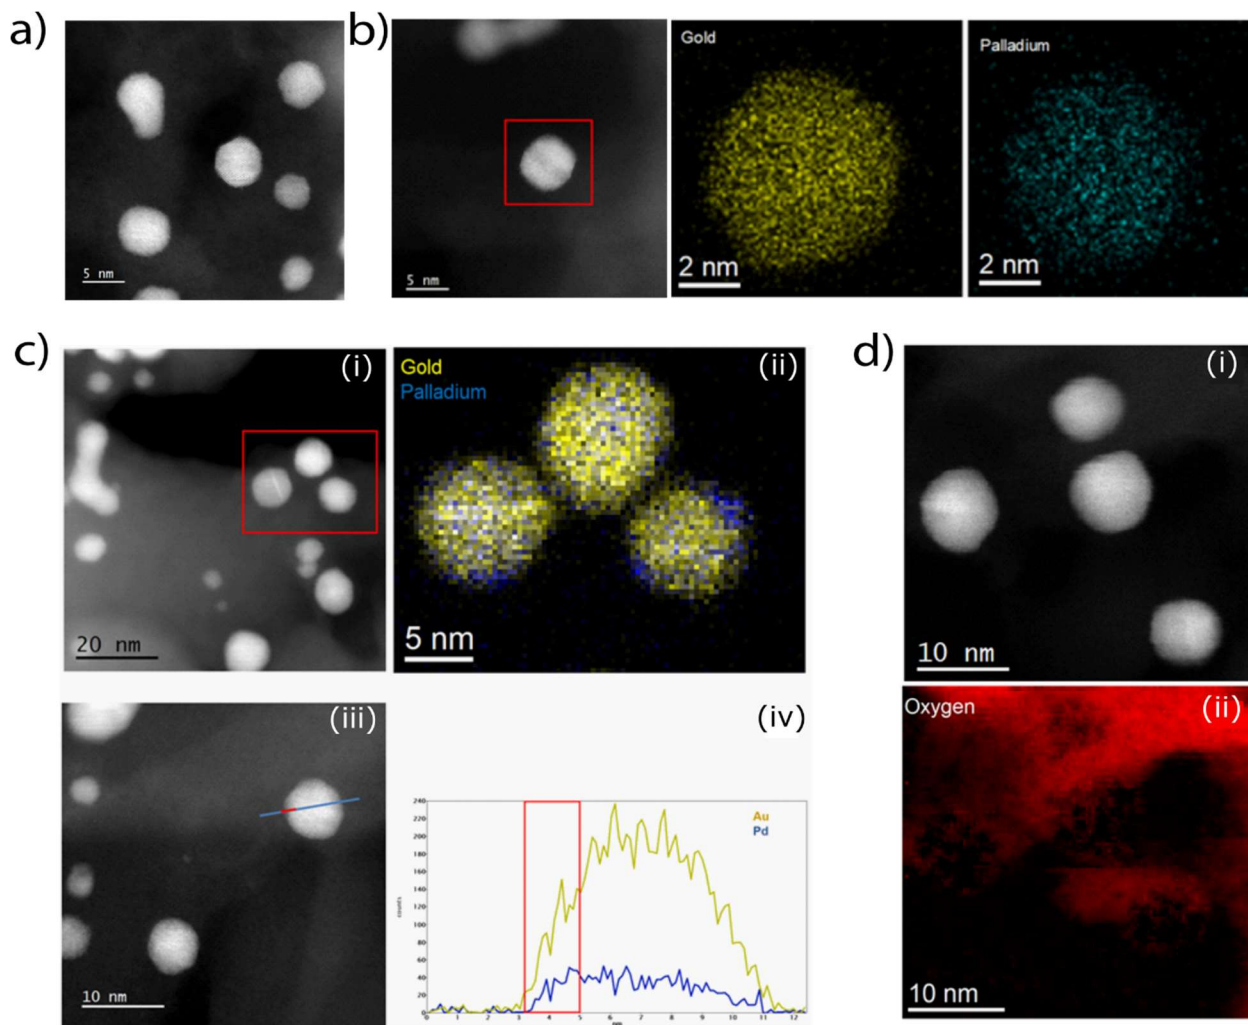

- 5 Supplementary Figure 1 | STEM and EDS measurements. (a) Atomic resolution dark-field STEM image of Pd<sub>8</sub>Au<sub>92</sub> particles on RCT-SiO<sub>2</sub>. (b) EDS maps of a single particle showing homogeneous elemental distribution, observed in >90% of the particles. (c) Evidence of localized Pd segregation at edges of some particles. EDS map in (ii) corresponds to the red box in (i). Line scan in (iv) corresponds to the cross-section in (iii) with dimmer edge region indicating an excess of Pd. (d)
- 10 (i) STEM image of four particles and (ii) the EELS map for the O K-edge. The O signal emanates only from the silica support.

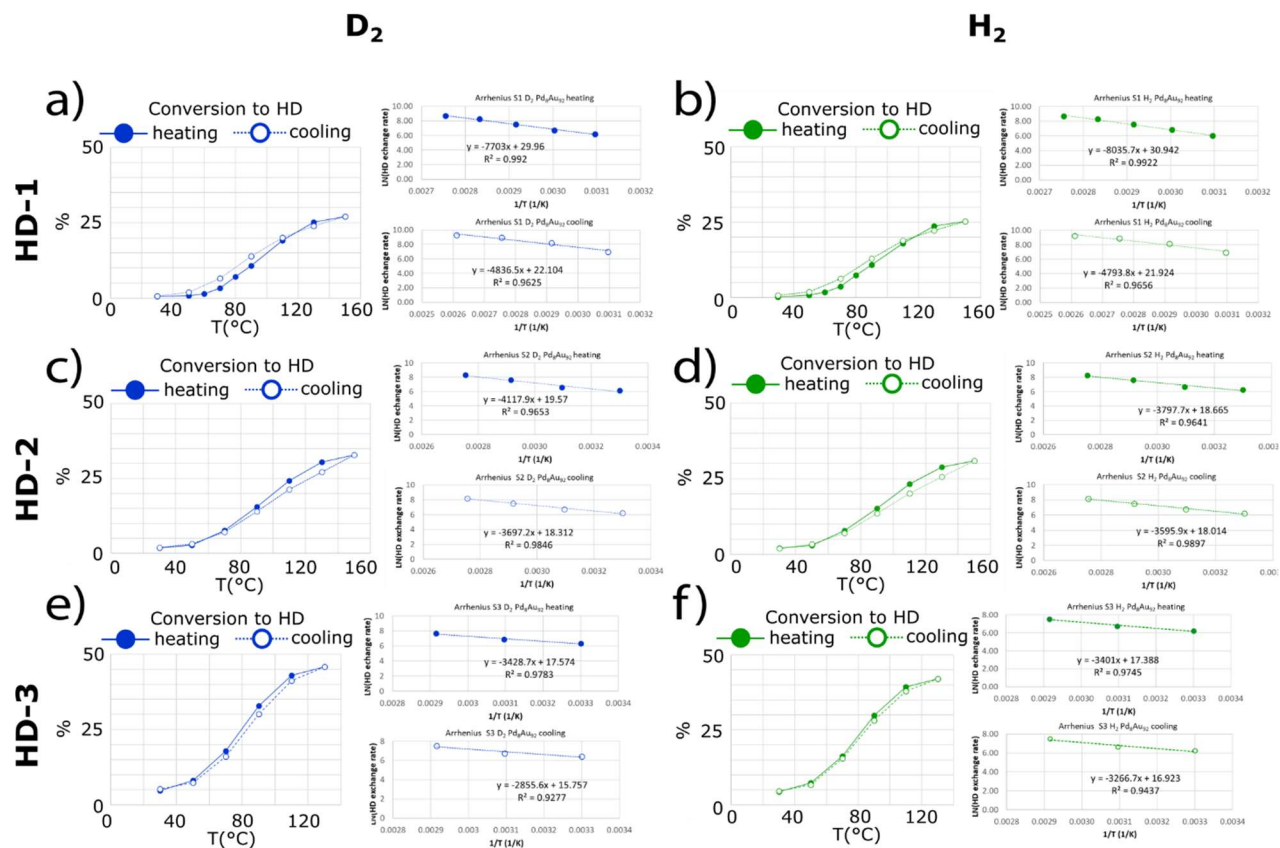

Supplementary Figure 2 | HD exchange reaction data. The conversion and the Arrhenius plots calculated from D<sub>2</sub> (a, c, e) and H<sub>2</sub> (b, d, f) are shown for the experiments HD-1 (sample S1), HD-2 (sample S2), and HD-3 (sample S3) with Pd<sub>8</sub>Au<sub>92</sub>/RCT-SiO<sub>2</sub>.

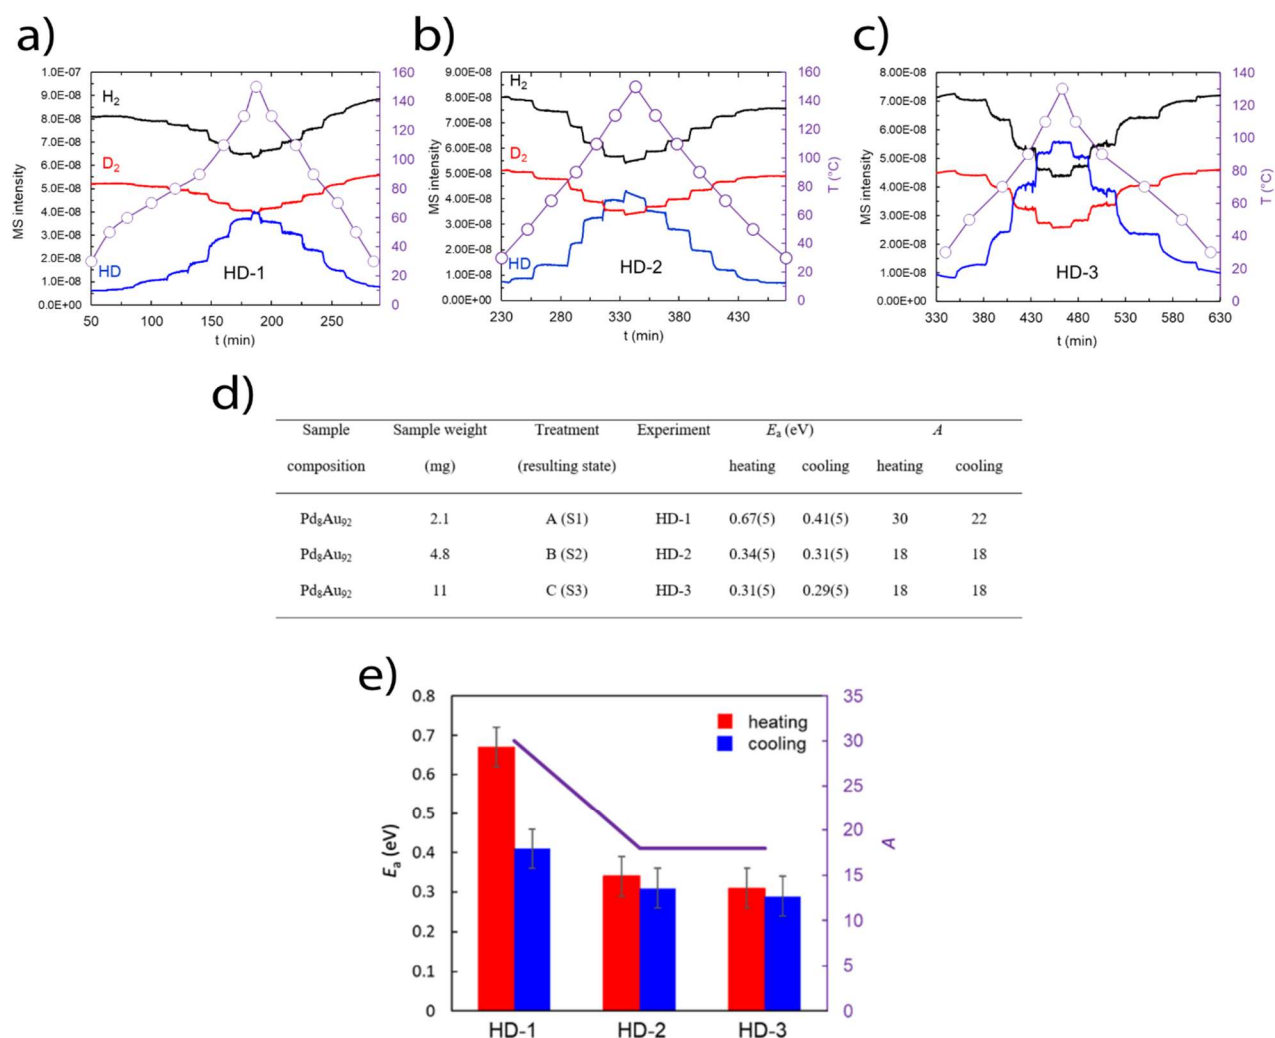

Supplementary Figure 3 | HD exchange reaction profiles and kinetic parameters. (a-c) MS signal during the experiments HD-1 (sample S1), HD-2 (sample S2), and HD-3 (sample S3) with  $\text{Pd}_8\text{Au}_{92}/\text{RCT-SiO}_2$ . (d-e) Experimental details, apparent activation energies ( $E_a$ ), and axis intercepts ( $A$ ) obtained from the Arrhenius plot (i.e., the natural log of the rate of conversion vs.  $1/T$ ). Error values were calculated from the average between  $E_a$  calculated from  $\text{H}_2$  signal and  $\text{D}_2$  signal. Errors were presented as 2.5 times estimated standard deviation covering 99% of the population.



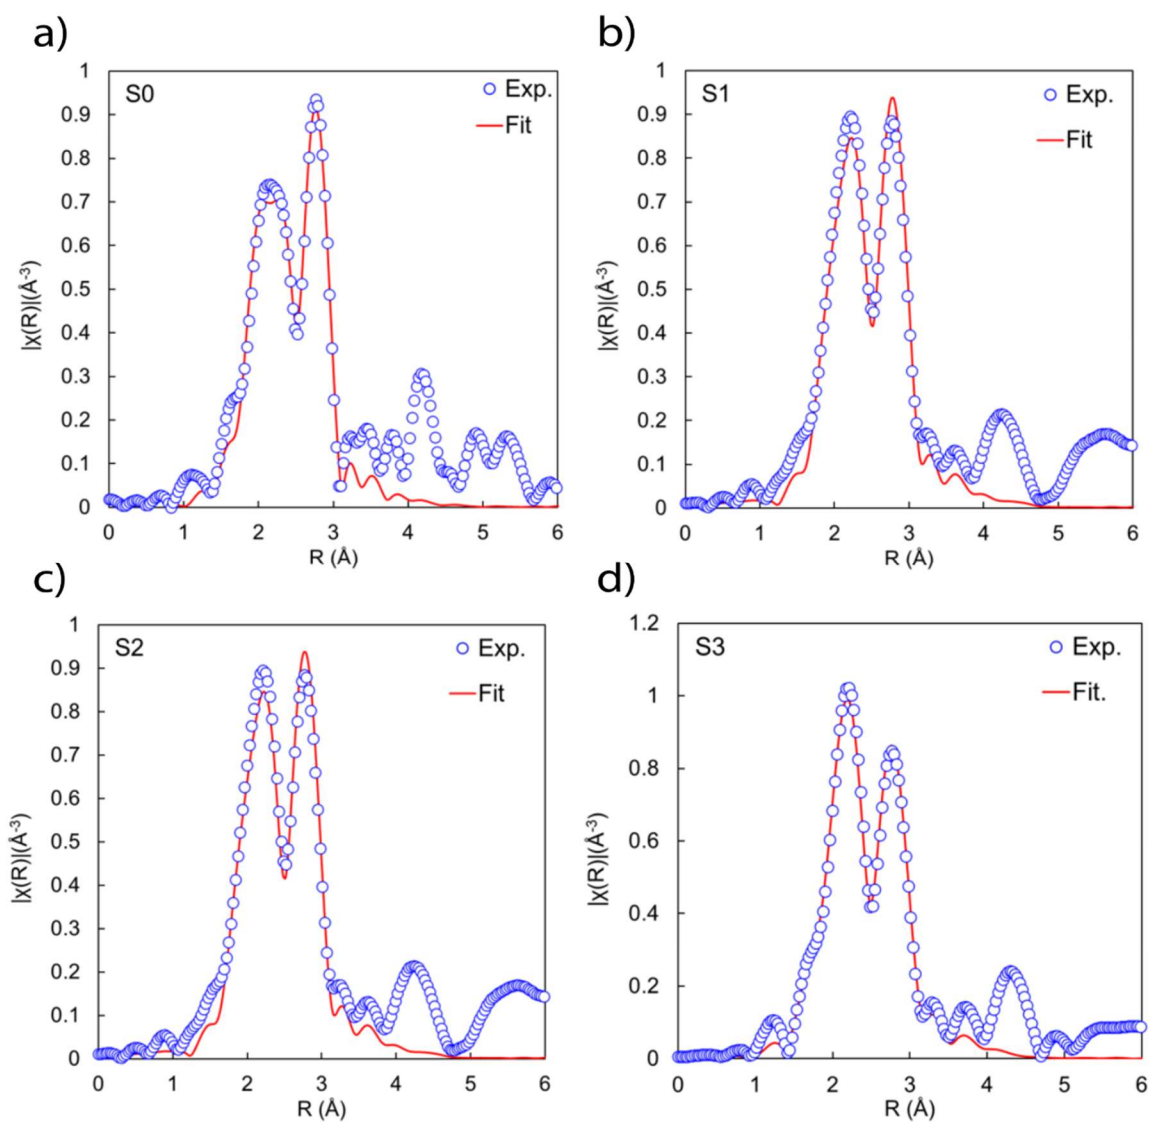

Supplementary Figure 4 | EXAFS data and fits. Comparison between the experimental and fitted

5 EXAFS data in r-space for samples S0 (a), S1 (b), S2 (c) and S3 (d).

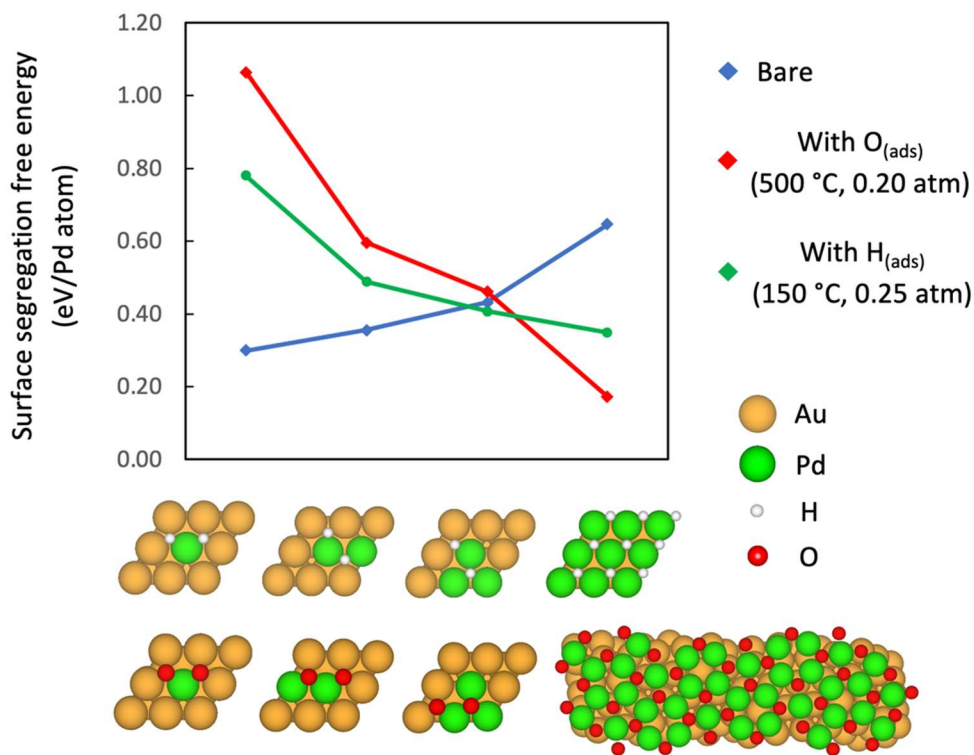

Supplementary Figure 5 | Surface segregation of Pd/Au(111). DFT-computed Gibbs free energies of surface segregation for Pd monomer, dimer, and trimer, as well as extended Pd models (Pd monolayer and surface oxide Pd<sub>5</sub>O<sub>4</sub> from a previous study of Pd/Ag(111)<sup>6</sup>), referenced to subsurface Pd monomers and gas-phase O<sub>2</sub> and H<sub>2</sub>. A correction of +0.53 eV per O<sub>2</sub> molecule is applied to address the DFT overestimation of the bond energy. The relative stability of the ensembles is inverted upon chemisorption. O<sub>2</sub> provides a strong thermodynamic driving force to form larger metastable ensembles.

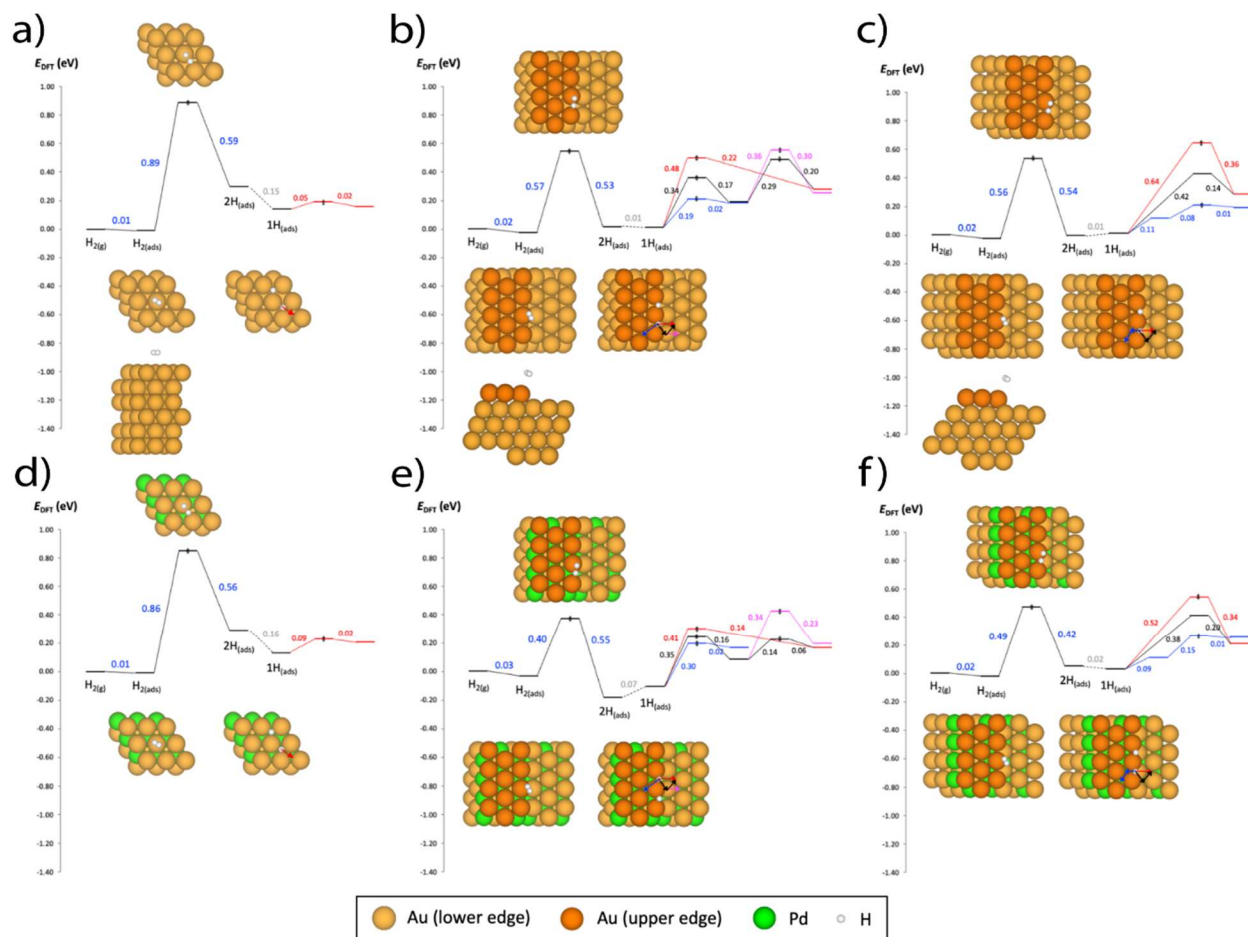

Supplementary Figure 6 | Transition state pathways on extended Au surfaces. DFT-computed potential energy diagram for H<sub>2</sub> dissociative adsorption followed by atomic H diffusion on (a-c) pure Au and (d-f) subsurface Pd monolayer with (111), (211), and (331) facets (left to right). Numbers indicate energy differences between adjacent states. Diffusion pathways are labeled with different colors. Transition states are labeled with ‡. The dotted line indicates a change of reference from H<sub>2(g)</sub> to 1/2 H<sub>2(g)</sub> for 1H<sub>(ads)</sub> states.

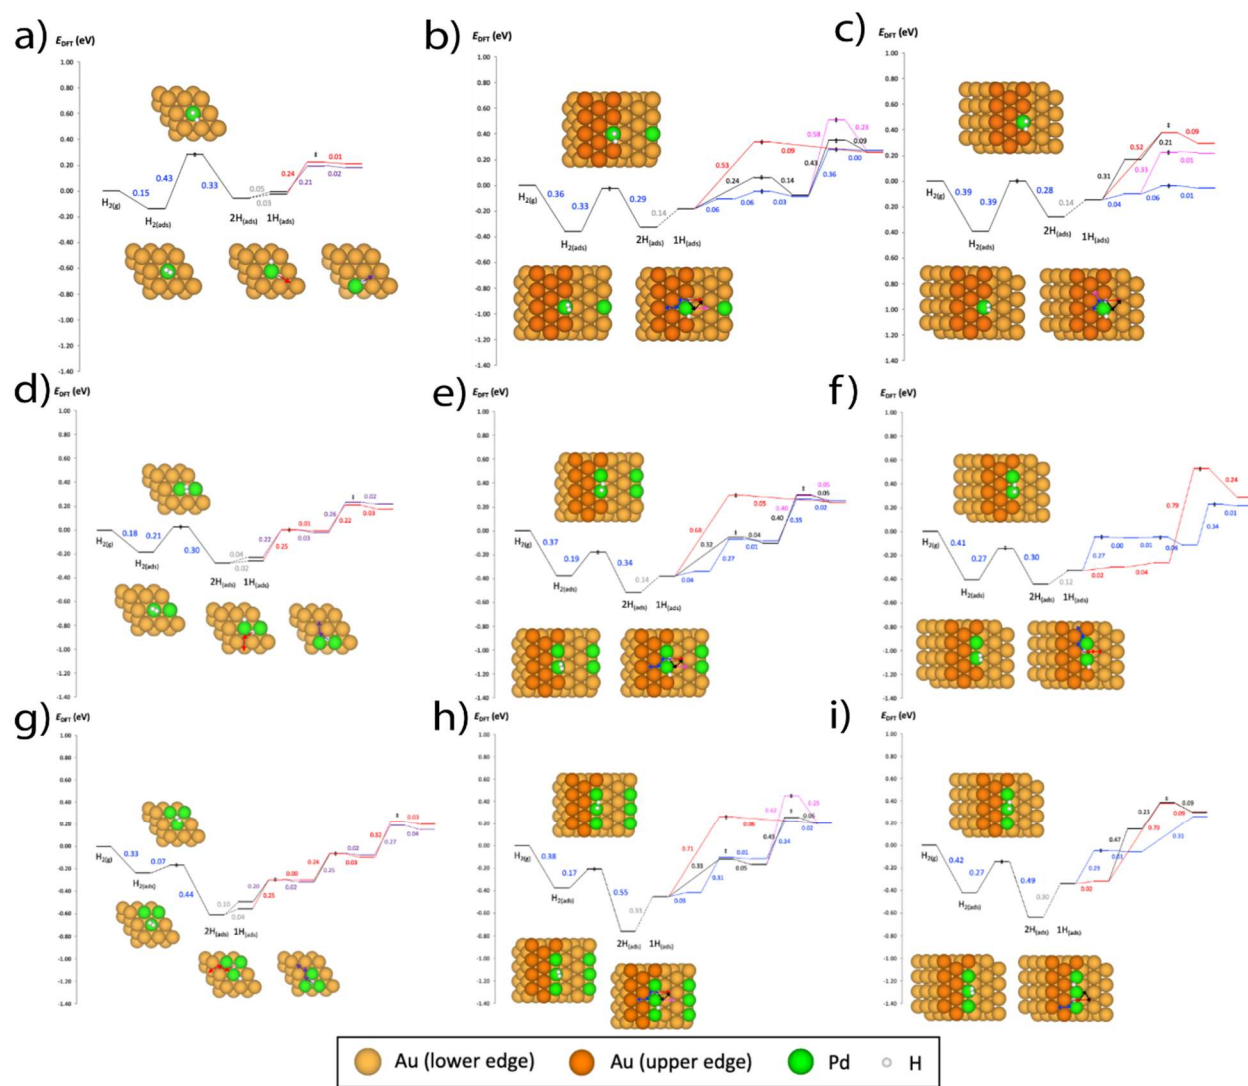

Supplementary Figure 7 | Transition state pathways on dilute Pd ensembles. DFT-computed potential energy diagram for  $H_2$  dissociative adsorption followed by atomic H diffusion on (a-c) Pd monomer, (d-f) dimer, and (g-i) trimer with (111), (211), and (331) facets (left to right). Numbers indicate energy differences between adjacent states. Diffusion pathways are labeled with different colors. Transition states are labeled with  $\ddagger$ . The dotted line indicates a change of reference from  $H_{2(g)}$  to  $\frac{1}{2} H_{2(g)}$  for  $1H_{(ads)}$  states.

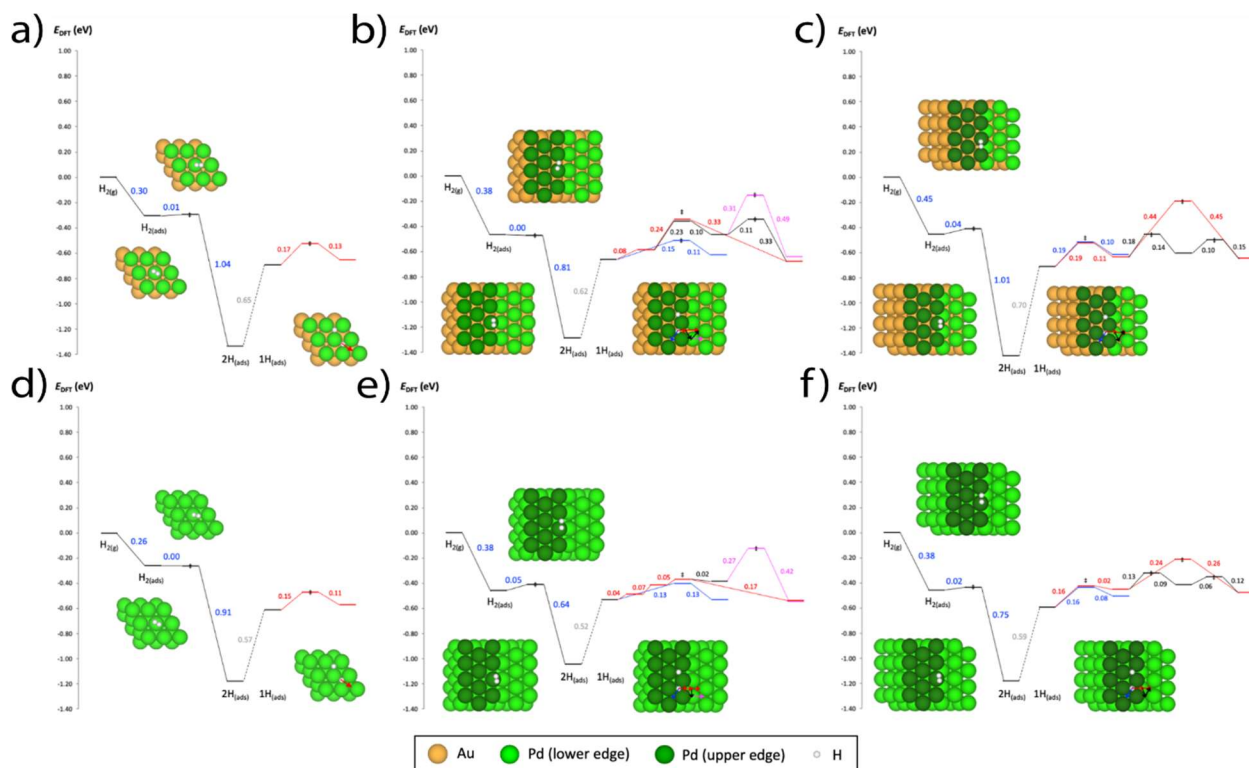

Supplementary Figure 8 | Transition state pathways on extended Pd surfaces. DFT-computed potential energy diagram for  $H_2$  dissociative adsorption followed by atomic H diffusion on (a-c) Pd monolayer and (d-f) pure Pd with (111), (211), and (331) facets (left to right). Numbers indicate energy differences between adjacent states. Diffusion pathways are labeled with different colors. Transition states are labeled with ‡. The dotted line indicates a change of reference from  $H_{2(g)}$  to  $\frac{1}{2} H_{2(g)}$  for  $1H_{(ads)}$  states.

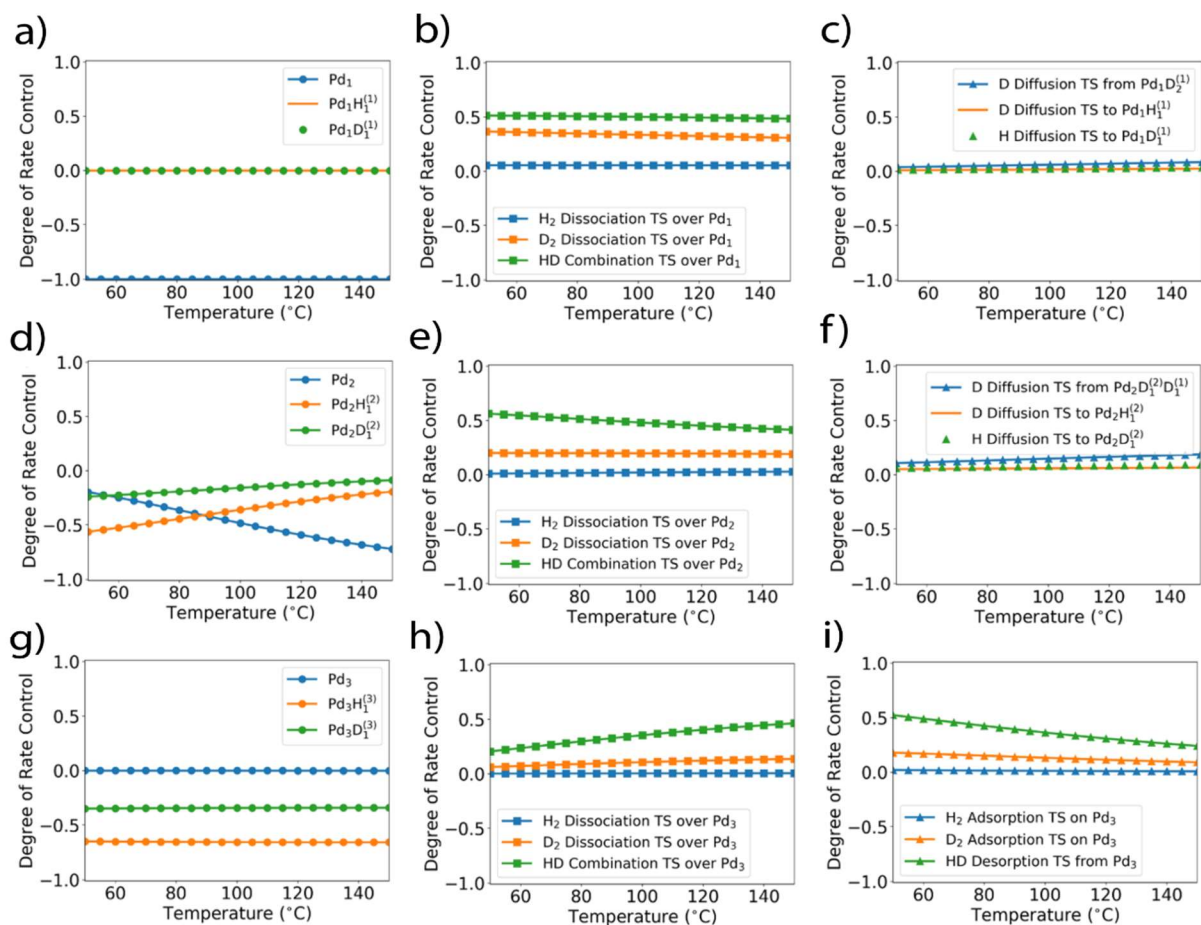

Supplementary Figure 9 | The degrees of rate control for key intermediates and transition states (TS) on dilute Pd ensembles. (a-c) On Pd monomers, the bare site is the rate-controlling intermediate, and the rate-controlling TS corresponds to D<sub>2</sub> dissociation and HD formation. (d-f) On Pd dimers, as the temperature increases, the rate-controlling intermediate switches from Pd<sub>2</sub>H<sub>1</sub><sup>(2)</sup> and Pd<sub>2</sub>D<sub>1</sub><sup>(2)</sup> to bare Pd<sub>2</sub>, while the rate-controlling TS corresponds to D<sub>2</sub> dissociation and HD formation. (g-i) On Pd trimers, the rate-controlling intermediates are Pd<sub>3</sub>H<sub>1</sub><sup>(2)</sup> and Pd<sub>3</sub>D<sub>1</sub><sup>(3)</sup>. In contrast to monomers and dimers, the rate-controlling TS corresponds to D<sub>2</sub> adsorption and HD desorption at 50 °C.



## Supplementary References

1. Guo, X. C., Hoffman, A. & Yates, J. T. Adsorption kinetics and isotopic equilibration of oxygen adsorbed on the Pd(111) surface. *J. Chem. Phys.* 90, 5787–5792 (1989).
- 5 2. Wellendorff, J. et al. A benchmark database for adsorption bond energies to transition metal surfaces and comparison to selected DFT functionals. *Surf. Sci.* 640, 36–44 (2015).
3. Herzberg, G. *Molecular Spectra and Molecular Structure. I. Spectra of Diatomic Molecules.* *Am. J. Phys.* 19, 390–391 (1951).
- 10 4. Wang, L., Maxisch, T. & Ceder, G. Oxidation energies of transition metal oxides within the GGA+U framework. *Phys. Rev. B* 73, 195107 (2006).
- 5 15 5. Reuter, K. & Scheffler, M. Composition, structure, and stability of RuO<sub>2</sub> (110) as a function of oxygen pressure. *Phys. Rev. B* 65, 35406 (2001).
6. van Spronsen, M. A. et al. Dynamics of Surface Alloys: Rearrangement of Pd/Ag(111) Induced by CO and O<sub>2</sub>. *J. Phys. Chem. C* 123, 8312–8323 (2019).
- 20 7. Monkhorst, H. J. & Pack, J. D. Special points for Brillouin-zone integrations. *Phys. Rev. B* 13, 5188–5192 (1976).
8. Kristinsdóttir, L. & Skúlason, E. A systematic DFT study of hydrogen diffusion on transition metal surfaces. *Surf. Sci.* 606, 1400–1404 (2012).
- 25 9. Lucci, F. R. et al. Controlling Hydrogen Activation, Spillover, and Desorption with Pd–Au Single-Atom Alloys. *J. Phys. Chem. Lett.* 7, 480–485 (2016).
10. Yu, W.-Y., Mullen, G. M., Flaherty, D. W. & Mullins, C. B. Selective Hydrogen Production from Formic Acid Decomposition on Pd–Au Bimetallic Surfaces. *J. Am. Chem. Soc.* 136, 11070–11078 (2014).
- 30 11. van der Hoeven, J. E. S. et al. Entropic Control of HD Exchange Rates over Dilute Pd-in-Au Alloy Nanoparticle Catalysts. *ACS Catal.* 11, 6971–6981 (2021).
- 35 12. Busnengo, H. F., Salin, A. & Dong, W. Representation of the 6D potential energy surface for a diatomic molecule near a solid surface. *J. Chem. Phys.* 112, 7641 (2000).
- 40 13. Cramer, C. J. *Essentials of Computational Chemistry: Theories and Models.* (Wiley, 2004).
